# Supplementary material for: Research priorities relating to the delivery of cardiovascular prevention and rehabilitation programmes: results of a modified Delphi process
Source: HighWire-hosted journal article supplement (doi:10.1136/openhrt-2022-002248), 2023-04-01
Supplement: openhrt-2022-002248supp001_data_supplement.pdf [file openhrt-2022-002248supp001_data_supplement.pdf]

**Appendix 1: PICO\* Used in Literature Review**

| Design                                                          | P                                                                                                                                                                                                                                                                                                                                                                                                                                                                                                                                                                                                                                                                                | I                                                                                                                                                                                                                                                                                                                                                                                                                                    | C                                                              | O                                                                                                                                                                                                                                                                                                                                                                                                                                                                                                                                                                           |
|-----------------------------------------------------------------|----------------------------------------------------------------------------------------------------------------------------------------------------------------------------------------------------------------------------------------------------------------------------------------------------------------------------------------------------------------------------------------------------------------------------------------------------------------------------------------------------------------------------------------------------------------------------------------------------------------------------------------------------------------------------------|--------------------------------------------------------------------------------------------------------------------------------------------------------------------------------------------------------------------------------------------------------------------------------------------------------------------------------------------------------------------------------------------------------------------------------------|----------------------------------------------------------------|-----------------------------------------------------------------------------------------------------------------------------------------------------------------------------------------------------------------------------------------------------------------------------------------------------------------------------------------------------------------------------------------------------------------------------------------------------------------------------------------------------------------------------------------------------------------------------|
| Systematic reviews, RCT's, guidelines and CR audits/evaluations | Coronary Heart Disease/CHD/Heart disease/cardiac disease<br>Myocardial Infarction/MI/myocardial ischemia<br>Acute Coronary Syndrome/NSTEMI/STEMI/Unstable Angina<br>Stable Angina<br>Heart Failure/HFrEF/HFpEF<br>PCI/CABG/angioplasty/Revascularisation/<br>Post valve surgery/<br>Atrial fibrillation/arrhythmia<br>Post heart transplant<br>Congenital heart disease/<br>Post implantable cardioverter defibrillator<br>Inherited cardiac conditions/hypertrophic cardiomyopathy<br>Cardiac resynchronisation therapy<br>Age: no restrictions<br>Time limiters: 2015 – to date (post search dates for Anderson L, Thompson DR, Oldridge N, Zwisler AD, Rees K, et al. (2016)) | *Multi-component cardiac rehabilitation (CR)<br>Structured delivery by CR staff<br>Under supervision of CR staff<br>Inpatient/outpatient<br>Delivered anywhere globally<br>Time: anytime relative to event/diagnosis<br><br>*Multi-component to include any of BACPR core components:<br>Health behaviour change and education, lifestyle risk factor management, psychosocial health, medical risk management, long-term strategies | Usual care – patients with index event not participating in CR | Primary/secondary outcomes (BACPR components)<br><br>Total mortality<br>Cardiovascular mortality<br>Major cardiovascular events (include no. of events per pt. & no. of pts. having an event)<br>Non-fatal myocardial infarction<br>Hospital readmission all cause<br>Hospital readmission specific to CV/cardiac/HF related<br>Unplanned hospital readmission for any cardiovascular event<br>Exercise capacity<br>Quality of Life<br>BMI/waist circumference/weight<br>Tobacco cessation<br>Blood pressure/glucose/blood lipids<br>Medication adherence<br>Return to work |

(\*Population, Interention, Comparison, Outcomes)
